# Supplementary material for: Silica coated PbS nanowires
Source: Royal Society of Chemistry journal article supplement (doi:10.1039/b517258f), 2006-01-01
Supplement: b517258f.pdf [file b517258f.pdf]

Supplementary Data

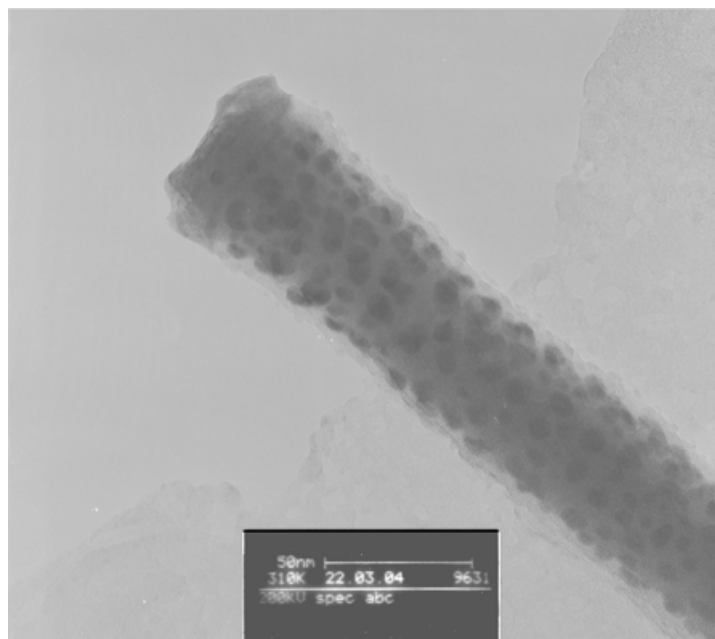

Figure S1: TEM image of PbS nanoparticles within the matrix of nanowire grown at 700 °C on substrate 1.
